# Supplementary material for: Genetic diversity and evolutionary insights of respiratory syncytial virus A ON1 genotype: global and local transmission dynamics
Source: PubMed Central journal article supplement (PMC4588507; doi:10.1038/srep14268), 2015-09-30
Supplement: srep14268-s1.pdf [file srep14268-s1.pdf]

## Supplementary Material

### *Title*

**Genetic diversity and evolutionary insights of respiratory syncytial virus A ON1 genotype: global and local transmission dynamics.**

### *Authors:*

Venkata R. Duvvuri<sup>1,2#,\*</sup>, Andrea Granados<sup>1,3#</sup>, Paul Rosenfeld<sup>1</sup>, Justin Bahl<sup>4</sup>, Alireza Eshaghi<sup>1</sup>, Jonathan B. Gubbay<sup>1,3,5,6\*</sup>

*# These authors contributed equally to this work.*

### *Affiliations*

<sup>1</sup> Public Health Ontario, Toronto, Ontario, Canada

<sup>2</sup> University of Waterloo, Waterloo, Ontario, Canada (MPH student)

<sup>3</sup> University of Toronto, Ontario, Canada

<sup>4</sup> Center for Infectious Diseases, The University of Texas School of Public Health, Houston, Texas, United States of America.

<sup>5</sup> Mount Sinai Hospital, Toronto, Ontario, Canada

<sup>6</sup> The Hospital for Sick Children, Toronto, Ontario, Canada

### *\*Corresponding authors*

Dr. Jonathan Gubbay  
Medical Microbiologist  
Public Health Ontario Laboratory  
Ontario Agency for Health Protection and Promotion (OAHPP)  
81 Resources Rd,  
Toronto, ON M9P 3T1  
[jonathan.gubbay@oahpp.ca](mailto:jonathan.gubbay@oahpp.ca)

### *Co-corresponding author:*

Dr. Venkata R Duvvuri, [venkata.duvvuri@oahpp.ca](mailto:venkata.duvvuri@oahpp.ca)

## Supplementary Material

**Table S1. RSV-A ON1 G-gene sequences used in the study.**

| Country                                                | Strain Identifier                            | Accession Number                                                    | G-gene Sequences (length 330bp)                                    |            |            |           |                 | G-gene Sequences (length 696bp)                                    |           |            |           |                 |
|--------------------------------------------------------|----------------------------------------------|---------------------------------------------------------------------|--------------------------------------------------------------------|------------|------------|-----------|-----------------|--------------------------------------------------------------------|-----------|------------|-----------|-----------------|
|                                                        |                                              |                                                                     | Number of sequences collected during season (October to September) |            |            |           | Total sequences | Number of sequences collected during season (October to September) |           |            |           | Total sequences |
|                                                        |                                              |                                                                     | 2010-2011                                                          | 2011-2012  | 2012-2013  | 2013-2014 |                 | 2010-2011                                                          | 2011-2012 | 2012-2013  | 2013-2014 |                 |
| Canada                                                 | ON, C, E, H, I                               | JN257693, JN257694, KP321974-KP322010, KR871317-KR871349            | 10                                                                 | 50         |            |           | 60              | 10                                                                 | 1         |            |           | 11              |
| China                                                  | BJ, GZ                                       | KC461212, KC461213, KC559442, KC559440, KM586845, KM586834          |                                                                    |            | 5          |           | 5               |                                                                    |           | 5          |           | 5               |
| Croatia                                                | HR                                           | KF057865, KF057866, KF057867                                        |                                                                    |            | 2          |           | 2               |                                                                    |           |            |           | 0               |
| Cuba                                                   | CU2011                                       | KC754738, KC754743, KC677857-KC677877, KC283043, KC283044           |                                                                    | 8          | 12         |           | 20              |                                                                    | 8         | 12         |           | 20              |
| Germany                                                | HD, WUE                                      | KJ710364-KJ710420, JX912355-JX912364                                |                                                                    | 10         | 29         |           | 39              |                                                                    |           |            |           | 0               |
| India                                                  | NIV                                          | KF246639, KF246640, KC731482, KF246641, KF246638                    | 1                                                                  | 4          |            |           | 5               | 1                                                                  | 4         |            |           | 5               |
| Italy                                                  | RM, AN                                       | JX988439 to JX988452, KC858199-KC858257                             |                                                                    | 14         | 52         |           | 66              |                                                                    |           |            |           | 0               |
| Japan                                                  | AH, AS, Chiba, Kanagawa, Yamaguchi, Yokohama | AB761609, AB761610, AB761611, AB754590, AB698559, AB808757-AB808780 |                                                                    | 13         | 16         |           | 29              |                                                                    |           | 4          |           | 4               |
| Kenya                                                  | KEN                                          | KF587911-KF588014                                                   |                                                                    | 28         | 49         |           | 77              |                                                                    | 28        | 49         |           | 77              |
| Korea                                                  | GM                                           | JX627336                                                            |                                                                    | 1          |            |           | 1               |                                                                    | 1         |            |           | 1               |
| Latvia                                                 | LV                                           | KF030154                                                            |                                                                    | 1          |            |           | 1               |                                                                    |           |            |           | 0               |
| Malaysia                                               | MY                                           | JX256871                                                            |                                                                    | 1          |            |           | 1               |                                                                    |           |            |           | 0               |
| Panama                                                 | PAN                                          | KF300973-KF301018                                                   | 13                                                                 | 9          |            |           | 22              | 13                                                                 | 9         |            |           | 22              |
| Paraguay                                               | Py                                           | KM508823, KM508824, KM508825, KM508826                              |                                                                    |            | 4          |           | 4               |                                                                    |           | 4          |           | 4               |
| Peru                                                   | PER                                          | KJ627264, KJ627347                                                  |                                                                    | 1          |            |           | 1               |                                                                    | 1         |            |           | 1               |
| Philippines                                            | ONP, BPH                                     | AB846656, AB846657, AB846655, AB846651, AB846652, AB846653          |                                                                    |            | 6          |           | 6               |                                                                    |           | 6          |           | 6               |
| South Africa                                           | SA, RXH                                      | KC476744, KC476745, JX885730-JX885737                               |                                                                    | 10         |            |           | 10              |                                                                    | 2         |            |           | 2               |
| Spain                                                  | MAD, VH                                      | KF915227-KF915265, KM402618-KM402671                                |                                                                    |            | 25         | 53        | 78              |                                                                    |           | 25         | 53        | 78              |
| Thailand                                               | CU2011                                       | KC342406, KC342413, KC342419, KC342434, KC342441                    | 3                                                                  | 2          |            |           | 5               | 3                                                                  | 2         |            |           | 5               |
| USA                                                    | LA2, TX                                      | KJ890469-KJ890479, KM042382-KM042392, KJ672424-KJ672480             |                                                                    | 3          | 48         |           | 51              |                                                                    |           | 40         |           | 40              |
| <b>Total sequences used in the current study</b>       |                                              |                                                                     | <b>27</b>                                                          | <b>155</b> | <b>248</b> | <b>53</b> | <b>483</b>      | <b>27</b>                                                          | <b>56</b> | <b>145</b> | <b>53</b> | <b>281</b>      |
| <b>Total countries covered in the current analysis</b> |                                              |                                                                     | <b>3</b>                                                           | <b>15</b>  | <b>11</b>  | <b>1</b>  | <b>20</b>       | <b>3</b>                                                           | <b>8</b>  | <b>8</b>   | <b>1</b>  | <b>15</b>       |

## Supplementary Material

**Table S2. Exact geographical area of collected specimens from each country.**

| <b>Country<br/>(specimen collection period)</b> | <b>Province/City/Hospital/Surveillance systems</b>                                                          | <b>Reference</b>         |
|-------------------------------------------------|-------------------------------------------------------------------------------------------------------------|--------------------------|
| Canada (2010-2012)                              | Ontario                                                                                                     | 1                        |
| China (2012-2013)                               | Beijing, Chongqing, Shanghai                                                                                | 2-4                      |
| Croatia (2012-2013)                             | Exact location not available                                                                                | Unpublished              |
| Cuba (2011-2013)                                | Exact location not available                                                                                | Unpublished              |
| Cyprus (2012-2013)                              | Nicosia                                                                                                     | 5                        |
| Germany (2011-2013)                             | Bavaria, Heidelberg                                                                                         | 6-7                      |
| India (2010-2012)                               | Pune                                                                                                        | 8                        |
| Italy (2011-2013)                               | Rome, Ancona                                                                                                | 9                        |
| Japan (2011-2013)                               | Fukui, Chiba, Tochigi, Yamaguchi, Kanagawa                                                                  | 10-11                    |
| Kenya (2011-2012)                               | Kilifi                                                                                                      | 12                       |
| South Korea (2011-2012)                         | ARI-NET and KINRESS                                                                                         | 13                       |
| Latvia (2011-2012)                              | Riga                                                                                                        | 14                       |
| Malaysia (2011-2012)                            | Kuala Lumpur                                                                                                | 15                       |
| Panama (2010-2012)                              | Exact location not available                                                                                | Unpublished <sup>#</sup> |
| Paraguay (2012-2013)                            | Exact location not available                                                                                | Unpublished <sup>#</sup> |
| Peru (2011-2012)                                | Lima                                                                                                        | Unpublished <sup>#</sup> |
| Philippines (2012-2013)                         | Palawan, Puerto Princesa                                                                                    | Unpublished <sup>#</sup> |
| South Africa (2011-2012)                        | Cape Town, Gauteng Province, KwaZulu-Natal Province, Mpumalanga Province, and North-West Province, Pretoria | 16-17                    |
| Spain (2012-2014)                               | Catalonia                                                                                                   | 18                       |
| Thailand (2010-2011)                            | Bangkok and Khon Kaen provinces                                                                             | 19                       |
| USA (2011-2013)                                 | Texas, Tennessee                                                                                            | 20                       |

<sup>#</sup> RSV-A ON1 G-gene sequences are directly submitted to NCBI Genbank. G-gene sequences from Cyprus are not available in NCBI Genbank.

## Supplementary Material

### References cited in Table S2.

1. Eshaghi, A. *et al.* Genetic variability of human respiratory syncytial virus A strains circulating in Ontario: A novel genotype with a 72 nucleotide G gene duplication. *PLOS One*. **7**, 1-10 (2012).
2. Cui, G. *et al.* Genetic variation in attachment glycoprotein genes of human respiratory syncytial virus subgroups A and B in children in recent five consecutive years. *PLOS One*. **8**, 1-12 (2013).
3. Liu, J. *et al.* Genetic variation of human respiratory syncytial virus among children with fever and respiratory symptoms in Shanghai, China, from 2009 to 2012. *Infect Genet Evol*. **27**, 131-6 (2014).
4. Ren, L. *et al.* The genetic variability of glycoproteins among respiratory syncytial virus subtype A in China between 2009 and 2013. *Infect Genet Evol*. **27**, 339-47 (2014).
5. Panayiotou, C. *et al.* Epidemiology of respiratory syncytial virus in children in Cyprus during three consecutive winter seasons (2010-2013): Age distribution, seasonality and association between prevalent genotypes and disease severity. *Epidemiol Infect*. **142**, 2406-11(2014).
6. Prifert, C., Streng, A., Krempf, C., Liese, J. & Weissbrich, B. Novel respiratory syncytial virus A genotype, Germany, 2011-2012. *Emerg Infect Dis*. **19**, 1029-30 (2013).
7. Tabatabai, J., Prifert, C., Pfeil, J., Grulich-Henn, J. & Schnitzler, P. Novel Respiratory Syncytial Virus (RSV) Genotype ON1 Predominates in Germany during Winter Season 2012–13. *PLOS One*. **9**, 1-9 (2014).
8. Choudhary, M., Anand, S., Wadhwa, B. & Chadha, M. Genetic variability of human respiratory syncytial virus in Pune, Western India. *Infect Genet Evol*. **20**, 369-77 (2013).
9. Pierangeli, A. *et al.* Rapid spread of the novel respiratory syncytial virus A ON1 genotype, central Italy, 2011 to 2013. *Euro Surveill*. **19**, 1-10 (2014).
10. Hirano, E. *et al.* Molecular evolution of human respiratory syncytial virus attachment glycoprotein (G) gene of new genotype ON1 and ancestor NA1. *Infect Genet Evol*. **28**, 183-91 (2014).
11. Tsukagoshi, H. *et al.* Genetic analysis of attachment glycoprotein (G) gene in new genotype ON1 of human respiratory syncytial virus detected in Japan. *Microbiol Immunol*. **57**, 655-9 (2013).
12. Agoti, C., Otieno, J., Gitahi, C., Cane, P. & Nokes, D. Rapid spread and diversification of respiratory syncytial virus genotype ON1, Kenya. *Emerg Infect Dis*. **20**, 950-9 (2014).
13. Kim, Y. *et al.* Rapid replacement of human respiratory syncytial virus A with the ON1 genotype having a 72 nucleotide duplication in G gene. *Infect Genet Evol*. **26**, 103-12 (2014).
14. Balmaks, R., Ribakova, I., Gardovska, D. & Kazaks, A. Molecular epidemiology of human respiratory syncytial virus over three consecutive seasons in Latvia. *J Med Virol*. **86**, 1971-82 (2014).

## Supplementary Material

15. Khor, C., Sam, I., Hoopi, P. & Chan, Y. Displacement of predominant respiratory syncytial virus genotypes in Malaysia between 1989 and 2011. *Infect Genet Evol.* **14**, 357-60 (2013).
16. Valley Omar, Z., Muloiwa, R., Hu, N., Eley, B. & Hsiao, N. Novel respiratory syncytial virus subtype ON1 among children, Cape Town, South Africa, 2012. *Emerg Infect Dis.* **19**, 668-70 (2013).
17. Pretorius, M. *et al.* Replacement and positive evolution of subtype A and B respiratory syncytial virus G-protein genotypes from 1997-2012 in South Africa. *J Infect Dis.* **208**, S227-37 (2013).
18. Gimferrer, L. *et al.* Molecular epidemiology and molecular characterization of respiratory syncytial viruses at a tertiary care university hospital in Catalonia (Spain) during the 2013-2014 season. *J Clin Virol.* **66**, 27-32 (2015).
19. Auksornkitti, V. *et al.* Molecular characterization of human respiratory syncytial virus, 2010-2011: Identification of genotype ON1 and a new subgroup B genotype in Thailand. *Arch Virol.* **159**, 499-507 (2014).
20. Avadhanula, V. *et al.* Infection with Novel Respiratory Syncytial Virus Genotype Ontario (ON1) in Adult Hematopoietic Cell Transplant Recipients, Texas, 2011–2013. *J Infect Dis.* **211**, 582-9 (2015).

## Supplementary Material

**Table S3. Estimated mean evolutionary rates, and basic reproductive number ( $R_0$ ) of RSV-A ON1 G-gene sequences<sup>#</sup> by country.**

| Country<br>(number of<br>sequences) | Coalescent Method  | Mean Evolutionary Rate<br>(substitutions/site/year) |                      |                      | $R_0$ |                     |                     |
|-------------------------------------|--------------------|-----------------------------------------------------|----------------------|----------------------|-------|---------------------|---------------------|
|                                     |                    | $\times 10^{-3}$<br>Mean                            | 95%<br>BCI<br>Lower  | 95%<br>BCI<br>Upper  | Mean  | 95%<br>BCI<br>Lower | 95%<br>BCI<br>Upper |
| Canada<br>(n=60)                    | Exponential Growth | 3.12                                                | $1.0 \times 10^{-3}$ | $5.6 \times 10^{-3}$ | 1.03  | 1.007               | 1.07                |
| Germany<br>(n=39)                   | Exponential Growth | 5.5                                                 | $1.8 \times 10^{-3}$ | $8.9 \times 10^{-3}$ | 1.04  | 1.008               | 1.08                |
| Italy (n=66)                        | Exponential Growth | 4.04                                                | $1.4 \times 10^{-4}$ | $8.9 \times 10^{-3}$ | 1.01  | 0.99                | 1.03                |
| Japan<br>(n=29)                     | Exponential Growth | 6.6                                                 | $5.7 \times 10^{-4}$ | $1.5 \times 10^{-2}$ | 1.01  | 1.0                 | 1.03                |
| Kenya<br>(n=77)                     | Exponential Growth | 2.23                                                | $7.7 \times 10^{-4}$ | $3.9 \times 10^{-3}$ | 1.003 | 1.004               | 1.01                |
| Spain<br>(n=78)                     | Exponential Growth | 1.56                                                | $4.3 \times 10^{-4}$ | $2.9 \times 10^{-3}$ | 1.005 | 0.99                | 1.01                |
| Panama<br>(n=22)                    | Exponential Growth | 2.97                                                | $4.8 \times 10^{-4}$ | $5.6 \times 10^{-3}$ | 1.02  | 1.0                 | 1.04                |
| USA<br>(n=51)                       | Exponential Growth | 1.9                                                 | $4.7 \times 10^{-4}$ | $3.7 \times 10^{-3}$ | 1.01  | 1.0009              | 1.02                |

BCI: Bayesian credible intervals,  $R_0$ : Basic reproduction number

# Second hypervariable region of G-gene (330bp length).

## Supplementary Material

**Table S4.  $R_0$  values quantified for infectious diseases using genetic data and incidence data**

| Pathogen                                                                  | Genetic data                             | Number of sequences | $R_0$ from sequences (95% BCI)   | $R_0$ range from incidence data |
|---------------------------------------------------------------------------|------------------------------------------|---------------------|----------------------------------|---------------------------------|
| Respiratory Syncytial Virus                                               | G-gene (Set G330)                        | 483                 | 1.017 (1.012-1.022) <sup>#</sup> | 1.2-2.1 <sup>1</sup>            |
|                                                                           | G-gene (Set ON)                          | 60                  | 1.030 (1.007-1.07) <sup>#</sup>  |                                 |
| Pandemic 2009 H1N1                                                        | Hemagglutinin                            | 23                  | 1.2 <sup>2</sup>                 | 1.4 - 1.6 <sup>2</sup>          |
| Pandemic 2009 H1N1                                                        | whole genome                             | 100 <sup>##</sup>   | 1.12 (1.07 - 1.16) <sup>3</sup>  | 1.3 - 1.7 <sup>2-4</sup>        |
| Hepatitis C virus subtype 1a                                              | E1, NS5                                  | 34, 59              | 2.93 <sup>5</sup>                | 1.2 <sup>6</sup>                |
| Hepatitis C virus subtype 1b                                              | E1, NS5                                  | 76, 53              | 2.67 <sup>5</sup>                |                                 |
| Hepatitis C virus subtype 4                                               | E1, NS5                                  | 22, 18              | 1.68 <sup>5</sup>                |                                 |
| Hepatitis C virus subtype 6                                               | E1, NS5                                  | 23, 40              | 1.21 <sup>5</sup>                |                                 |
| 2014 Ebola virus (EBOV)                                                   | whole genome                             | 72                  | 1.65 - 2.18 <sup>7</sup>         | 1.51-2.53 <sup>8</sup>          |
| Middle East respiratory syndrome coronavirus (MERS-CoV)                   | whole genome                             | 10                  | 1.21 (1.08 - 1.40) <sup>9</sup>  | 0.42-0.80 <sup>10</sup>         |
| Epizootic Rabies virus                                                    | concatenated G, N and non-coding regions | -                   | 1.02-1.16 <sup>11</sup>          | 1.66-2.33 <sup>12</sup>         |
| Methicillin-resistant Staphylococcus aureus (MRSA) - <i>SPA-type</i> t008 | whole genome                             | 30                  | 1.24-1.34 <sup>13</sup>          | 0.60-1.0 <sup>14</sup>          |

# Specific to RSV-A ON1 genotype from the current study

## First two months of pandemic

## Supplementary Material

### References cited in Table S4.

1. Weber, A., Weber, M., & Milligan, P. Modeling epidemics caused by respiratory syncytial virus (RSV). *Math Biosci.* **172**, 95-113 (2001).
2. Fraser, C. *et al.* Pandemic potential of a strain of influenza A (H1N1): early findings. *Science* **324**:1557–1561 (2009).
3. Hedge, J., Lycett, S., & Rambaut, A. Real-time characterization of the molecular epidemiology of an influenza pandemic. *Biol Lett.* **9**, 20130331(2013).
4. White, L. *et al.* Estimation of the reproductive number and the serial interval in early phase of the influenza A/H1N1 pandemic in the USA. *Influenza Other Respir Viruses*, **3**, 267–276 (2009).
5. Pybus, O.G. *et al.* The epidemic behavior of the hepatitis C virus. *Science.* **292**, 2323-5 (2001).
6. Massad, E., Coutinho, F.A., Chaib, E., & Burattini, M.N. Cost-effectiveness analysis of a hypothetical hepatitis C vaccine compared to antiviral therapy. *Epidemiol Infect.* **137**, 241-9 (2009).
7. Stadler, T., Kuhnert, D., Rasmussen, D.A., & du Plessis, L. Insights into the Early Epidemic Spread of Ebola in Sierra Leone Provided by Viral Sequence Data. *PLoS Curr Outbreaks*. October 6, (2014).
8. Althaus, C.L. Estimating the Reproduction Number of Ebola Virus (EBOV) During the 2014 Outbreak in West Africa. *PLoS Curr Outbreaks*. September 2, (2014).
9. Cauchemez, S. *et al.* Middle East respiratory syndrome coronavirus: quantification of the extent of the epidemic, surveillance biases, and transmissibility. *Lancet Infect Dis*, **14**, 50-56 (2014).
10. Breban, R., Riou, J., & Fontanet, A. Interhuman transmissibility of Middle East respiratory syndrome coronavirus: estimation of pandemic risk. *Lancet.* **382**, 694-9 (2013).
11. Biek, R. *et al.* A high-resolution genetic signature of demographic and spatial expansion in epizootic rabies virus. *Proc Natl Acad Sci U S A.* **104**, 7993-8 (2007).
12. Coleman, P.G., Dye, C. Immunization coverage required to prevent outbreaks of dog rabies. *Vaccine.* **14**, 185-6 (1996).
13. Prosperi, M. *et al.* Molecular epidemiology of community-associated methicillin-resistant *Staphylococcus aureus* in the genomic era: a cross-sectional study. *Sci Rep* **3**, 1902 (2013).
14. Kajita, E., Okano, J. T., Bodine, E. N., Layne, S. P. & Blower, S. Modelling an outbreak of an emerging pathogen. *Nat Rev Microbiol.* **5**, 700–9 (2007).



## Supplementary Material

**Table S5. Parameter estimates, dN/dS, values of log-likelihood ( $l$ ), positively selected sites, and likelihood ratio tests (LRT) in the C-terminal hypervariable region of G-gene of RSV-A ON1 genotype viruses circulating globally (2010-2014), and Ontario, Canada (2010-2012).**

| Model                    | Parameter estimates                                                                                                          | Mean dN/dS | Log-likelihood ( $l$ ) | Positively selected sites (PSS) | Model comparison ( $2\Delta l$ , d.f, p)    |
|--------------------------|------------------------------------------------------------------------------------------------------------------------------|------------|------------------------|---------------------------------|---------------------------------------------|
| <b>Global (set G330)</b> |                                                                                                                              |            |                        |                                 |                                             |
| M1a                      | $\omega_0=0.0, \omega_1=1.00$<br>$p_0=0.26, (p_1=0.74)$                                                                      | 0.73       | -1371.540              | not allowed                     | M1a vs. M2a : 9.26,<br>d.f = 2<br>p = 0.009 |
| M2a                      | $\omega_0=0.0, \omega_1=1.00$<br><b><math>\omega_2=2.93</math></b><br>$p_0=0.28, p_1=0.42$<br><b><math>(p_2=0.29)</math></b> | 1.29       | -1366.909              | Twenty PSS listed in Table S4   |                                             |
| M7                       | $p=0.013, q=0.005$                                                                                                           | 0.66       | -1372.025              | not allowed                     | M7 vs. M8 : 10.06,<br>d.f = 2,<br>p = 0.006 |
| M8                       | $p_0=0.75, (p_1=0.25)$<br>$p=0.02, q=0.006$<br><b><math>\omega=3.24</math></b>                                               | 1.30       | -1366.991              | Forty one listed in Table S4    |                                             |
| <b>Ontario (set ON)</b>  |                                                                                                                              |            |                        |                                 |                                             |
| M1a                      | $\omega_0=0.0, \omega_1=1.00$<br>$p_0=0.35 (p_1=0.65)$                                                                       | 0.65       | -638.162               | not allowed                     | M1a vs. M2a : 6.44,<br>d.f = 2<br>p = 0.03  |
| M2a                      | $\omega_0=0.33, \omega_1=1.0$<br><b><math>\omega_2=6.42</math></b><br>$p_0=0.85, p_1=0$<br><b><math>(p_2=0.15)</math></b>    | 1.23       | -634.939               | Five PSS listed in Table S4     |                                             |
| M7                       | $p=0.045, q=0.022$                                                                                                           | 0.67       | -638.171               | not allowed                     | M7 vs. M8 : 6.45,<br>d.f = 2,<br>p = 0.02   |
| M8                       | $p_0=0.85, (p_1=0.15)$<br>$p=16.2, q=32.05$<br><b><math>\omega=6.43</math></b>                                               | 1.23       | -634.942               | Twelve PSS listed in Table S4   |                                             |

Neutral models (M1a, and M7) were compared with their respective alternative (selection) models (M2a and M8), which allow  $\omega > 1$ . Model comparison can be calculated using  $2\Delta l = 2(l_1 - l_0)$ , where  $l_1$  = LRT of alternative model; and  $l_0$  = LRT of null model. Proportion of PSS and their corresponding  $\omega$ -values in M2a and M8 models are in bolded italics. ON67-1210A (accession number: JN257693) was used as reference strain in both analyses.

## Supplementary Material

**Table S6. List of positively selected sites predicted by PAML (reference strain: ON67-1210A)**

| Type of dataset     | CODEML model (AA <sup>#</sup> ) | PSS using Bayes Empirical Bayes (BEB) analysis |                                       |                              |          |
|---------------------|---------------------------------|------------------------------------------------|---------------------------------------|------------------------------|----------|
|                     |                                 | p>50% to p<70%<br>(mean dN/dS ± S.E.)          | p>70% to p<90%<br>(mean dN/dS ± S.E.) | p>90%<br>(mean dN/dS ± S.E.) |          |
| Ontario<br>(set ON) | M2a (5)                         | Y273 (3.9 ± 3.4)                               | T306 (5.8 ± 3.1)                      | V303 (6.6 ± 2.6)             |          |
|                     |                                 | Y280 (3.8 ± 3.4)                               |                                       |                              |          |
|                     |                                 | L310 (3.7 ± 3.2)                               |                                       |                              |          |
|                     | M8 (12)                         | V225 (3.5 ± 3.1)                               | T306 (5.6 ± 2.9)                      | V303 (6.2 ± 2.6)             |          |
|                     |                                 | T241 (3.4 ± 3.1)                               |                                       |                              |          |
|                     |                                 | Y273 (3.9 ± 3.2)                               |                                       |                              |          |
|                     |                                 | L274 (3.7 ± 3.0)                               |                                       |                              |          |
|                     |                                 | Y280 (3.8 ± 3.2)                               |                                       |                              |          |
|                     |                                 | L289 (3.5 ± 3.1)                               |                                       |                              |          |
|                     |                                 | Y304 (3.4 ± 3.1)                               |                                       |                              |          |
|                     |                                 | L310 (4.0 ± 3.0)                               |                                       |                              |          |
|                     |                                 | Q312 (3.4 ± 3.1)                               |                                       |                              |          |
|                     |                                 | T319 (3.4 ± 3.1)                               |                                       |                              |          |
|                     |                                 | Global<br>(set G330)                           |                                       |                              | M2a (20) |
| T231 (2.1 ± 1.3)    | L247 (3.1 ± 1.5)                |                                                | V303 (3.2 ± 1.4)                      |                              |          |
| T245 (2.3 ± 1.5)    | H266 (2.6 ± 1.4)                |                                                | N318 (3.2 ± 1.4)                      |                              |          |
| T246 (2.0 ± 1.3)    | L274 (2.6 ± 1.2)                |                                                |                                       |                              |          |
| T248 (2.5 ± 1.3)    | H290 (2.6 ± 1.4)                |                                                |                                       |                              |          |
| N250 (2.2 ± 1.2)    | T319 (2.8 ± 1.4)                |                                                |                                       |                              |          |
| E262 (2.4 ± 1.3)    |                                 |                                                |                                       |                              |          |
| Y273 (2.2 ± 1.4)    |                                 |                                                |                                       |                              |          |
| L289 (2.0 ± 1.3)    |                                 |                                                |                                       |                              |          |
| T306 (2.0 ± 1.3)    |                                 |                                                |                                       |                              |          |
| L310 (2.2 ± 1.1)    |                                 |                                                |                                       |                              |          |
| M8 (41)             | P217 (1.8 ± 1.1)                |                                                | T245 (2.3 ± 1.2)                      | V225 (2.8 ± 0.9)             |          |
|                     | K223 (1.7 ± 1.1)                |                                                | T249 (2.4 ± 1.1)                      | G232 (2.7 ± 0.9)             |          |
|                     | L226 (2.0 ± 1.2)                |                                                | N251 (2.3 ± 1.1)                      | L247 (2.7 ± 1.0)             |          |
|                     | T231 (2.1 ± 1.2)                |                                                | E262 (2.5 ± 1.1)                      | L274 (2.6 ± 0.9)             |          |
|                     | K233 (1.7 ± 1.1)                |                                                | H266 (2.5 ± 1.1)                      | Y304 (2.8 ± 0.9)             |          |
|                     | T235 (1.7 ± 1.1)                |                                                | G272 (2.5 ± 1.1)                      | N318 (2.8 ± 0.9)             |          |
|                     | T246 (2.1 ± 1.2)                |                                                | Y273 (2.2 ± 1.1)                      |                              |          |
|                     | L248 (2.0 ± 1.2)                |                                                | H290 (2.5 ± 1.1)                      |                              |          |
|                     | S250 (1.9 ± 1.2)                |                                                | L310 (2.3 ± 1.0)                      |                              |          |
|                     | H258 (1.9 ± 1.2)                |                                                | T319 (2.6 ± 1.0)                      |                              |          |
|                     | S260 (1.9 ± 1.2)                |                                                |                                       |                              |          |
|                     | S275 (1.8 ± 1.0)                |                                                |                                       |                              |          |
|                     | S283 (1.9 ± 1.2)                |                                                |                                       |                              |          |
|                     | L289 (2.0 ± 1.1)                |                                                |                                       |                              |          |
|                     | T292 (1.7 ± 1.1)                |                                                |                                       |                              |          |
| T293 (1.8 ± 1.1)    |                                 |                                                |                                       |                              |          |
| S294 (1.9 ± 1.2)    |                                 |                                                |                                       |                              |          |
| G296 (1.9 ± 1.1)    |                                 |                                                |                                       |                              |          |
| L298 (1.6 ± 1.0)    |                                 |                                                |                                       |                              |          |
| T306 (2.0 ± 1.1)    |                                 |                                                |                                       |                              |          |
| S307 (1.9 ± 1.1)    |                                 |                                                |                                       |                              |          |
| E308 (1.7 ± 1.1)    |                                 |                                                |                                       |                              |          |
| S313 (1.8 ± 1.1)    |                                 |                                                |                                       |                              |          |
| L314 (1.8 ± 1.1)    |                                 |                                                |                                       |                              |          |
| S317 (1.9 ± 1.1)    |                                 |                                                |                                       |                              |          |

PSS: Positively selected sites, S.E.: Square root of the variance.

#AA: Total number of amino acids with posterior probability greater than 50%

ON67-1210A (accession number: JN257693) was used as reference strain in both analyses.
